# Supplementary material
Source: Springer Nature journal article supplement (https://www.springermedizin.de/resource/supplementary/12889_2010_3516_MOESM4_ESM.pdf/9489156)
Supplement: MOESM4 [file 9489156]

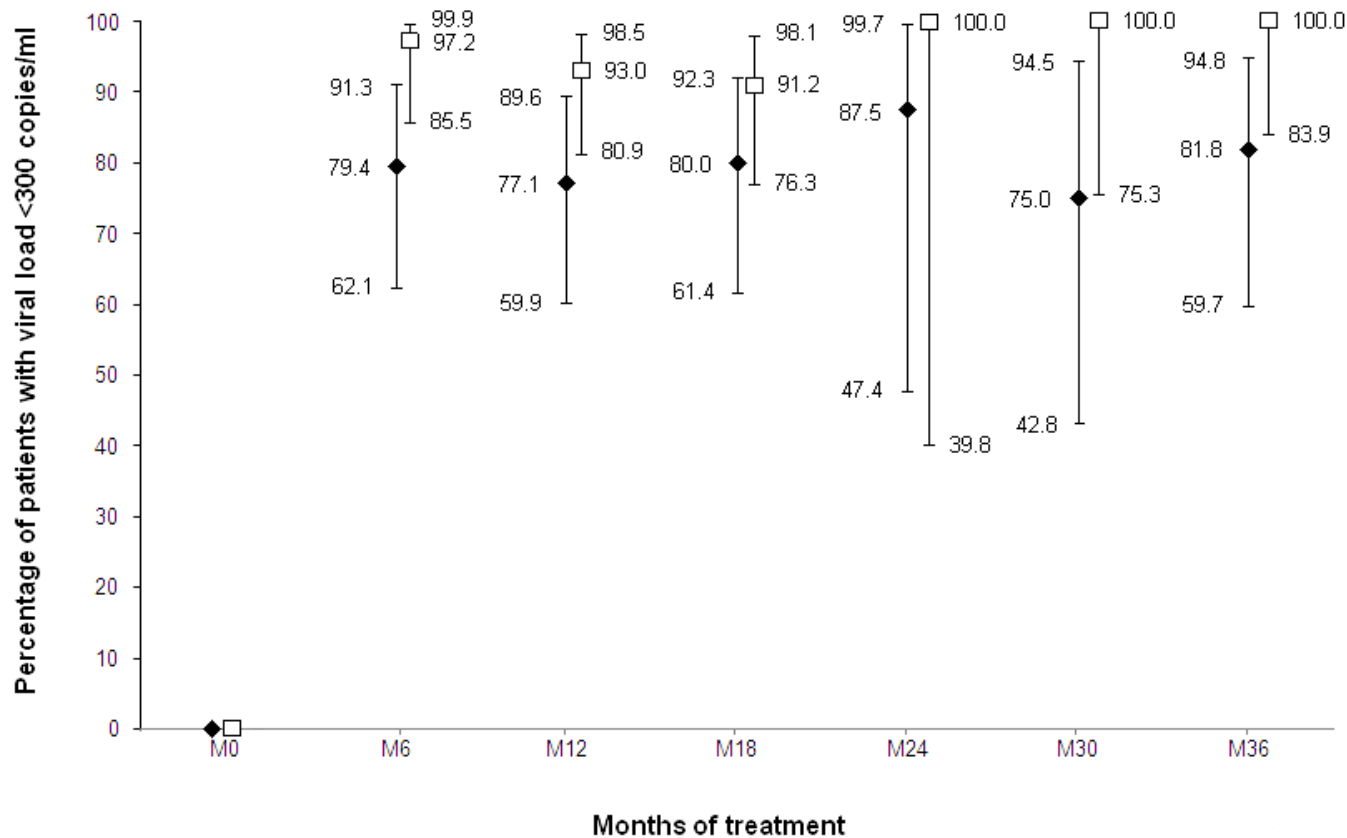

| Months of treatment                                            | M6   | M12  | M18  | M24  | M30  | M36  |
|----------------------------------------------------------------|------|------|------|------|------|------|
| <b>FSWs (◆)</b>                                                |      |      |      |      |      |      |
| Expected visits, No.                                           | 44   | 44   | 38   | 31   | 26   | 23   |
| HIV-1 RNA measurement available, No.                           | 34   | 35   | 30   | 8    | 12   | 22   |
| <b>Non-FSWs (□)</b>                                            |      |      |      |      |      |      |
| Expected visits, No.                                           | 48   | 47   | 42   | 32   | 30   | 25   |
| HIV-1 RNA measurement available, No.                           | 36   | 43   | 34   | 4    | 13   | 21   |
| <b>P value for difference between values at each timepoint</b> | 0.03 | 0.06 | 0.29 | 1.00 | 0.10 | 0.11 |
